# Supplementary material for: Low Vitamin D Status Is Associated with Increased Risk of Mortality in Korean Men and Adults with Hypertension: A Population-Based Cohort Study
Source: MDPI journal article supplement (doi:10.3390/nu14091849), 2022-04-28
Supplement: s1 [file s1]

**Supplementary Table S1.** Baseline characteristics of study population by level of serum 25(OH)D and sex

| Sex<br>Levels of serum 25(OH)D<br>(ng/mL) | Males                     |                           |                           |         | Females                   |                           |                            |         |
|-------------------------------------------|---------------------------|---------------------------|---------------------------|---------|---------------------------|---------------------------|----------------------------|---------|
|                                           | 0 – 12<br>(N = 979)       | 12 – 20<br>(N = 4,265)    | ≥ 20<br>(N = 4,081)       | p-Value | 0 – 12<br>(N = 2,734)     | 12 – 20<br>(N = 6,927)    | ≥ 20<br>(N = 3,756)        | p-Value |
| Mean follow-up (years)                    | 8.6±0.1 <sup>a</sup>      | 8.7±0.04 <sup>a</sup>     | 9.1±0.1 <sup>b</sup>      | <0.001  | 8.9±0.1 <sup>a</sup>      | 8.9±0.03 <sup>a</sup>     | 9.1±0.1 <sup>b</sup>       | <0.001  |
| Survey season (%)                         |                           |                           |                           |         |                           |                           |                            |         |
| Spring (March – May)                      | 35.9                      | 30.2                      | 16.1                      | <0.001  | 37.1                      | 25.7                      | 12.9                       | <0.001  |
| Summer (June – Aug)                       | 14.1                      | 21.9                      | 36.1                      |         | 13.9                      | 25.8                      | 36.9                       |         |
| Autumn (Sept – Nov)                       | 11.8                      | 20.7                      | 33.7                      |         | 14.5                      | 25.4                      | 35.9                       |         |
| Winter (Dec-Feb)                          | 38.2                      | 27.2                      | 14.1                      |         | 34.5                      | 23.1                      | 4.3                        |         |
| Mean serum 25(OH)D (ng/mL)                | 10.0±0.1 <sup>a</sup>     | 16.1±0.04 <sup>b</sup>    | 25.6±0.1 <sup>c</sup>     | <0.001  | 9.8±0.04 <sup>a</sup>     | 15.7±0.04 <sup>b</sup>    | 25.2±0.1 <sup>c</sup>      | <0.001  |
| Age (years)                               |                           |                           |                           |         |                           |                           |                            |         |
| 30-44                                     | 55.4                      | 51.4                      | 38.3                      | <0.001  | 50.4                      | 44.8                      | 32.0                       | <0.001  |
| 45-59                                     | 31.8                      | 35.3                      | 41.7                      |         | 31.4                      | 37.2                      | 38.6                       |         |
| 60-79                                     | 12.8                      | 13.3                      | 19.9                      |         | 18.2                      | 18.1                      | 29.4                       |         |
| Education (%)                             |                           |                           |                           |         |                           |                           |                            |         |
| Less than high school                     | 17.9                      | 20.2                      | 31.1                      | <0.001  | 31.5                      | 35.1                      | 48.4                       | <0.001  |
| High school graduate                      | 37.2                      | 36.1                      | 35.4                      |         | 40.3                      | 37.4                      | 31.5                       |         |
| University                                | 44.9                      | 43.6                      | 33.5                      |         | 29.1                      | 27.5                      | 20.1                       |         |
| Household income (%)                      |                           |                           |                           |         |                           |                           |                            |         |
| Lowest                                    | 12.3                      | 10.5                      | 13.0                      | 0.031   | 15.4                      | 15.1                      | 20.7                       | <0.001  |
| Lower middle                              | 27.0                      | 25.2                      | 25.5                      |         | 27.1                      | 26.7                      | 26.0                       |         |
| Upper middle                              | 32.7                      | 32.6                      | 30.0                      |         | 29.1                      | 29.7                      | 27.0                       |         |
| Highest                                   | 28.0                      | 31.7                      | 31.5                      |         | 28.4                      | 28.5                      | 26.2                       |         |
| Urban dweller (% , N)                     | 90.2 (861) <sup>c</sup>   | 83.7 (3,455) <sup>b</sup> | 70.7 (2,680) <sup>a</sup> | <0.001  | 86.0 (2,298) <sup>c</sup> | 82.4 (5,479) <sup>b</sup> | 74.0 (2,563) <sup>a</sup>  | <0.001  |
| Lifestyle                                 |                           |                           |                           |         |                           |                           |                            |         |
| Smoking status (%)                        |                           |                           |                           |         |                           |                           |                            |         |
| Never                                     | 13.3                      | 17.7                      | 17.0                      | 0.004   | 89.2                      | 89.3                      | 91.4                       | 0.012   |
| Former                                    | 22.0                      | 25.5                      | 25.3                      |         | 3.3                       | 4.1                       | 2.7                        |         |
| Current                                   | 64.8                      | 56.9                      | 57.7                      |         | 7.6                       | 6.6                       | 5.8                        |         |
| Current drinker (% , N)                   | 85.1 (787) <sup>a</sup>   | 87.3 (3,538) <sup>a</sup> | 87.2 (3,369) <sup>a</sup> | 0.245   | 63.0 (1,609) <sup>a</sup> | 67.2 (4,362) <sup>b</sup> | 65.7 (2,264) <sup>ab</sup> | 0.006   |
| Mean METs                                 | 1974.8±116.6 <sup>a</sup> | 2449.3±73.5 <sup>b</sup>  | 3319.7±98.5 <sup>c</sup>  | <0.001  | 1600.8±81.6 <sup>a</sup>  | 1995.9±49.5 <sup>b</sup>  | 2454.2±93.1 <sup>c</sup>   | <0.001  |
| Health status                             |                           |                           |                           |         |                           |                           |                            |         |
| Obesity (% , N)                           | 35.2 (326) <sup>a</sup>   | 40.6 (1,647) <sup>b</sup> | 38.1 (1,458) <sup>a</sup> | 0.002   | 27.2 (763) <sup>a</sup>   | 29.5 (2,105) <sup>b</sup> | 31.0 (1,197) <sup>b</sup>  | 0.071   |
| Hypertension (% , N)                      | 31.7 (335) <sup>ab</sup>  | 31.4 (1,486) <sup>a</sup> | 34.9 (1,548) <sup>b</sup> | 0.101   | 24.0 (728) <sup>a</sup>   | 22.9 (1,780) <sup>a</sup> | 28.4 (1,213) <sup>b</sup>  | <0.001  |
| Diabetes (% , N)                          | 10.2 (112) <sup>a</sup>   | 9.9 (486) <sup>a</sup>    | 10.3 (477) <sup>a</sup>   | 0.306   | 7.4 (224) <sup>a</sup>    | 7.6 (543) <sup>a</sup>    | 8.8 (357) <sup>b</sup>     | 0.006   |
| Biomarker                                 |                           |                           |                           |         |                           |                           |                            |         |
| SBP (mmHg)                                | 121.1±0.7 <sup>ab</sup>   | 120.2±0.3 <sup>a</sup>    | 121.6±0.3 <sup>b</sup>    | <0.001  | 115.6±0.4 <sup>a</sup>    | 115.8±0.3 <sup>a</sup>    | 117.7±0.4 <sup>b</sup>     | <0.001  |
| DBP (mmHg)                                | 80.7±0.5 <sup>a</sup>     | 80.5±0.2 <sup>a</sup>     | 80.4±0.2 <sup>a</sup>     | <0.001  | 74.6±0.3 <sup>a</sup>     | 74.6±0.2 <sup>a</sup>     | 74.8±0.2 <sup>a</sup>      | <0.001  |
| Glucose (mg/dL)                           | 100.2±1.1 <sup>a</sup>    | 100.6±0.4 <sup>a</sup>    | 100.0±0.4 <sup>a</sup>    | <0.001  | 96.1±0.5 <sup>a</sup>     | 96.5±0.3 <sup>a</sup>     | 96.8±0.4 <sup>a</sup>      | <0.001  |
| TG (mg/dL)                                | 191.4±6.7 <sup>c</sup>    | 172.1±2.8 <sup>b</sup>    | 158.3±2.4 <sup>a</sup>    | <0.001  | 119.7±2.0 <sup>b</sup>    | 115.8±1.4 <sup>ab</sup>   | 114.1±1.4 <sup>a</sup>     | <0.001  |
| TC (mg/dL)                                | 190.9±1.6 <sup>a</sup>    | 192.8±0.6 <sup>a</sup>    | 191.9±0.7 <sup>a</sup>    | <0.001  | 188.3±0.8 <sup>a</sup>    | 190.9±0.5 <sup>b</sup>    | 193.9±0.7 <sup>c</sup>     | <0.001  |
| HDL-C (mg/dL)                             | 45.1±0.5 <sup>a</sup>     | 46.1±0.2 <sup>b</sup>     | 46.6±0.2 <sup>b</sup>     | <0.001  | 50.8±0.3 <sup>a</sup>     | 51.8±0.2 <sup>b</sup>     | 51.5±0.2 <sup>b</sup>      | <0.001  |
| LDL-C (mg/dL)                             | 120.0±2.3 <sup>a</sup>    | 118.1±1.2 <sup>a</sup>    | 116.0±1.4 <sup>a</sup>    | 0.001   | 115.6±1.9 <sup>ab</sup>   | 114.4±1.1 <sup>a</sup>    | 119.6±1.6 <sup>b</sup>     | 0.614   |

Values are expressed as the mean ± standard error for continuous variables and the percentage (number of counts) for categorical variables. Statistical differences among serum 25(OH)D categories were determined using the general linear model for continuous variables and the chi-square test for categorical variables. Post-hoc analyses were conducted by Bonferroni test. Superscripted

letters indicate that values within a row without a common letter differ ( $p < 0.05$ ). Household income was categorized into quartiles (lowest:  $< 1,400,000$  KRW; lower-middle:  $1,400,000 - 2,670,000$  KRW; upper middle:  $2,680,000 - 4,166,000$  KRW; and highest:  $\geq 4,167,000$  KRW). 25(OH)D, 25-hydroxyvitamin D; DBP, diastolic blood pressure; HDL-C, high-density lipoprotein cholesterol; LDL-C, low-density lipoprotein cholesterol; MET, metabolic task equivalent; SBP, systolic blood pressure; TC, total cholesterol; TG, triglycerides.

**Supplementary Table S2.** Multivariable-adjusted hazard ratios (HRs) and 95% confidence intervals (CIs) for the association of serum 25(OH)D with all-cause mortality and cause-specific mortality using various 25(OH)D thresholds, stratified by sex

| Serum 25(OH)D (ng/mL)    | Total       |                    |                  |         | Male       |                    |                  |         | Female     |                    |                  |         |
|--------------------------|-------------|--------------------|------------------|---------|------------|--------------------|------------------|---------|------------|--------------------|------------------|---------|
|                          | Death/PY    | Weighted Death/PY  | HR (95% CI)      | p-value | Death/PY   | Weighted Death/PY  | HR (95% CI)      | p-value | Death/PY   | Weighted Death/PY  | HR (95% CI)      | p-value |
| All-cause mortality      |             |                    |                  |         |            |                    |                  |         |            |                    |                  |         |
| ≥20                      | 455/71,323  | 218,715/51,438,932 | 1.00 (ref)       |         | 303/36,761 | 151,351/31,744,736 | 1.00 (ref)       |         | 152/34,562 | 67,364/19,694,196  | 1.00 (ref)       |         |
| 10-19                    | 529/117,271 | 310,295/89,128,720 | 1.32 (1.10-1.58) | 0.003   | 288/41,872 | 185,827/41,341,805 | 1.48 (1.17-1.87) | 0.001   | 241/75,399 | 124,468/47,786,915 | 1.05 (0.81-1.37) | 0.706   |
| <10                      | 86/14,356   | 46,631/11,176,601  | 1.88 (1.35-2.61) | <0.001  | 41/3,294   | 25,015/3,575,379   | 2.34 (1.49-3.68) | <0.001  | 45/11,062  | 21,616/7,601,221   | 1.31 (0.82-2.08) | 0.252   |
| Cancer mortality         |             |                    |                  |         |            |                    |                  |         |            |                    |                  |         |
| ≥20                      | 159/71,323  | 77,283/51,438,932  | 1.00 (ref)       |         | 106/36,761 | 51,736/31,744,736  | 1.00 (ref)       |         | 53/34,562  | 25,548/19,694,196  | 1.00 (ref)       |         |
| 10-19                    | 186/117,271 | 110,930/89,128,720 | 1.41 (1.03-1.92) | 0.033   | 103/41,872 | 68,740/41,341,805  | 1.66 (1.11-2.46) | 0.013   | 83/75,399  | 42,190/47,786,915  | 1.01 (0.63-1.61) | 0.974   |
| <10                      | 30/14,356   | 16,358/11,176,601  | 1.96 (1.09-3.53) | 0.025   | 14/3,294   | 8,455/3,575,379    | 2.03 (0.92-4.49) | 0.081   | 16/11,062  | 7,903/7,601,221    | 1.57 (0.69-3.57) | 0.286   |
| Cardiovascular mortality |             |                    |                  |         |            |                    |                  |         |            |                    |                  |         |
| ≥20                      | 90/71,323   | 39,489/51,438,932  | 1.00 (ref)       |         | 49/36,761  | 22,885/31,744,736  | 1.00 (ref)       |         | 41/34,562  | 16,604/19,694,196  | 1.00 (ref)       |         |
| 10-19                    | 121/117,271 | 65,416/89,128,720  | 1.40 (0.95-2.05) | 0.088   | 56/41,872  | 33,630/41,341,805  | 2.05 (1.18-3.56) | 0.011   | 65/75,399  | 31,786/47,786,915  | 0.91 (0.55-1.52) | 0.729   |
| <10                      | 13/14,356   | 5,274/11,176,601   | 1.05 (0.48-2.27) | 0.905   | <10/3,294  | 1,525/3,575,379    | 0.73 (0.23-2.30) | 0.589   | <10/11,062 | 3,749/7,601,221    | 0.96 (0.37-2.48) | 0.938   |

All-cause mortality

|                          |             |                     |                  |        |            |                    |                  |        |            |                    |                  |       |
|--------------------------|-------------|---------------------|------------------|--------|------------|--------------------|------------------|--------|------------|--------------------|------------------|-------|
|                          |             |                     |                  |        |            |                    |                  |        |            |                    |                  |       |
| ≥16                      | 667/119,935 | 342,791/88,182,049  | 1.00 (ref)       |        | 424/57,213 | 228,556/50,920,199 | 1.00 (ref)       |        | 243/62,722 | 114,235/37,261,850 | 1.00 (ref)       |       |
| 12-15                    | 230/50,214  | 130,985/38,442,099  | 1.29 (1.04-1.60) | 0.022  | 126/16,461 | 80,083/16,918,182  | 1.60 (1.19-2.16) | 0.002  | 104/33,752 | 50,902/21,523,917  | 0.93 (0.69-1.24) | 0.608 |
| <12                      | 173/32,801  | 101,864/25,120,105  | 1.60 (1.24-2.05) | <0.001 | 82/8,253   | 53,555/8,823,540   | 1.94 (1.37-2.76) | <0.001 | 91/24,549  | 48,310/16,296,565  | 1.21 (0.87-1.67) | 0.259 |
| Cancer mortality         |             |                     |                  |        |            |                    |                  |        |            |                    |                  |       |
| ≥16                      | 238/119,935 | 123,509/88,182,049  | 1.00 (ref)       |        | 152/57,213 | 83,662/50,920,199  | 1.00 (ref)       |        | 86/62,722  | 39,847/37,261,850  | 1.00 (ref)       |       |
| 12-15                    | 82/50,214   | 46,100/38,442,099   | 1.38 (0.98-1.93) | 0.064  | 45/16,461  | 28,454/16,918,182  | 1.71 (1.07-2.73) | 0.026  | 37/33,752  | 17,646/21,523,917  | 0.98 (0.60-1.59) | 0.921 |
| <12                      | 55/32,801   | 34,962/25,120,105   | 1.68 (1.13-2.52) | 0.011  | 26/8,253   | 16,814/8,823,540   | 1.67 (0.95-2.95) | 0.078  | 29/24,549  | 18,149/16,296,565  | 1.52 (0.87-2.66) | 0.139 |
| Cardiovascular mortality |             |                     |                  |        |            |                    |                  |        |            |                    |                  |       |
| ≥16                      | 137/119,935 | 63,812/88,182,049   | 1.00 (ref)       |        | 71/57,213  | 35,748/50,920,199  | 1.00 (ref)       |        | 66/62,722  | 28,063/37,261,850  | 1.00 (ref)       |       |
| 12-15                    | 46/50,214   | 25,544/38,442,099   | 1.22 (0.77-1.94) | 0.391  | 21/16,461  | 12,259/16,918,182  | 1.76 (0.89-3.49) | 0.105  | 25/33,752  | 13,285/21,523,917  | 0.88 (0.50-1.56) | 0.662 |
| <12                      | 41/32,801   | 20,824/25,120,105   | 1.57 (0.96-2.56) | 0.073  | 18/8,253   | 10,033/8,823,540   | 2.46 (1.13-5.39) | 0.024  | 23/24,549  | 10,791/16,296,565  | 1.11 (0.61-2.02) | 0.729 |
|                          |             |                     |                  |        |            |                    |                  |        |            |                    |                  |       |
| All-cause mortality      |             |                     |                  |        |            |                    |                  |        |            |                    |                  |       |
| ≥30                      | 113/12,516  | 53,430/8,423,117    | 1.00 (ref)       |        | 72/7,216   | 34,409/5,574,582   | 1.00 (ref)       |        | 41/5,300   | 19,021/2,848,535   | 1.00 (ref)       |       |
| 12-29                    | 784/157,633 | 420,346/118,200,000 | 1.02 (0.80-1.29) | 0.897  | 478/66,459 | 274,230/62,263,798 | 1.27 (0.96-1.67) | 0.093  | 306/91,175 | 146,116/55,937,233 | 0.61 (0.39-0.96) | 0.031 |
| <12                      | 173/32,801  | 101,864/25,120,105  | 1.48 (1.06-2.05) | 0.020  | 82/8,253   | 53,555/8,823,540   | 2.07 (1.36-3.14) | 0.001  | 91/24,549  | 48,310/16,296,565  | 0.78 (0.47-1.32) | 0.358 |
| Cancer mortality         |             |                     |                  |        |            |                    |                  |        |            |                    |                  |       |
| ≥30                      | 39/12,516   | 19,006/8,423,117    | 1.00 (ref)       |        | 28/7,216   | 12,466/5,574,582   | 1.00 (ref)       |        | 11/5,300   | 6,540/2,848,535    | 1.00 (ref)       |       |
| 12-29                    | 281/157,633 | 150,602/118,200,000 | 0.97 (0.62-1.50) | 0.880  | 169/66,459 | 99,650/62,263,798  | 1.13 (0.72-1.79) | 0.600  | 112/91,175 | 50,952/55,937,233  | 0.67 (0.27-1.65) | 0.381 |

|                          |             |                    |                  |       |           |                   |                   |       |           |                   |                  |       |
|--------------------------|-------------|--------------------|------------------|-------|-----------|-------------------|-------------------|-------|-----------|-------------------|------------------|-------|
| <12                      | 55/32,801   | 34,962/25,120,105  | 1.46 (0.83-2.56) | 0.191 | 26/8,253  | 16,814/8,823,540  | 1.57 (0.80-3.07)  | 0.187 | 29/24,549 | 18,149/16,296,565 | 1.05 (0.39-2.86) | 0.922 |
| Cardiovascular mortality |             |                    |                  |       |           |                   |                   |       |           |                   |                  |       |
| ≥30                      | 20/12,516   | 8,286/8,423,117    | 1.00 (ref)       |       | 10/7,216  | 4,111/5,574,582   | 1.00 (ref)        |       | 10/5,300  | 4,175/2,848,535   | 1.00 (ref)       |       |
| 12-29                    | 163/157,633 | 81,069/118,200,000 | 1.55 (0.79-3.02) | 0.199 | 82/66,459 | 43,896/62,263,798 | 3.27 (1.15-9.32)  | 0.027 | 81/91,175 | 37,173/55,937,233 | 0.63 (0.29-1.41) | 0.261 |
| <12                      | 41/32,801   | 20,824/25,120,105  | 2.21 (0.97-5.03) | 0.058 | 18/8,253  | 10,033/8,823,540  | 6.35 (1.75-23.07) | 0.005 | 23/24,549 | 10,791/16,296,565 | 0.76 (0.29-1.96) | 0.570 |

The HRs and 95% CIs were calculated using a Cox proportional hazard regression model after adjusting for age, sex, region, income, smoking status, alcohol consumption, physical activity, and body mass index. 25(OH)D, 25-hydroxyvitamin D; PY, Person-year
